# Supplementary material for: European Qualitative research project on Patient-preferred outcomes in Early Rheumatoid Arthritis (EQPERA): rationale, design and methods of a multinational, multicentre, multilingual, longitudinal qualitative study
Source: PubMed Central journal article supplement — BMJ Open. 2019 Mar 27;9(3):e023606. doi: 10.1136/bmjopen-2018-023606 (PMC6475365; doi:10.1136/bmjopen-2018-023606), 2019-03-27
Supplement: bmjopen-2018-023606supp002.pdf [file bmjopen-2018-023606supp002.pdf]

## Supplementary file 2 EQPERA Data collection template

| Enrollment and interview logistics ( $t_1$ and $t_2$ )                                                                                        |                                                                             |
|-----------------------------------------------------------------------------------------------------------------------------------------------|-----------------------------------------------------------------------------|
| Respondent ID                                                                                                                                 | ID number                                                                   |
| Date of birth                                                                                                                                 | dd/mm/yyyy                                                                  |
| Gender                                                                                                                                        | man, woman, X                                                               |
| Respondents' place of residence                                                                                                               | postal code, location                                                       |
| Responsible recruiter                                                                                                                         | function, name, contact details                                             |
| Rheumatology center                                                                                                                           | name, location                                                              |
| Type of rheumatology center                                                                                                                   | academic hospital, general hospital, private practice                       |
| Treating rheumatologist                                                                                                                       | name                                                                        |
| Date of diagnosis                                                                                                                             | dd/mm/yyyy                                                                  |
| Symptom duration                                                                                                                              | in months, [date of diagnosis - date of symptom onset]                      |
| Disease duration                                                                                                                              | in months; calculated with date of diagnosis                                |
| Comorbidity                                                                                                                                   | no severe comorbidities present [yes/no]                                    |
| Date of RA treatment initiation                                                                                                               | dd/mm/yyyy                                                                  |
| Months of treatment experience at $t_1$                                                                                                       | date interview $t_1$ - date treatment initiation = between 3-6 months       |
| Initial treatment                                                                                                                             | the local treatment protocol for early RA: free text, no details on dosages |
| Initial treatment allocated according to clinical prognostic factors                                                                          | yes/no                                                                      |
| Step-down strategy                                                                                                                            | yes/no (as initial treatment strategy)                                      |
| MTX-only step-up                                                                                                                              | yes/no (as initial treatment strategy)                                      |
| MTX + early bridging glucocorticoids                                                                                                          | yes/no (as initial treatment strategy)                                      |
| o glucocorticoids starting dose <30mg/day                                                                                                     | yes/no                                                                      |
| o glucocorticoids starting dose $\geq$ 30mg/day                                                                                               | yes/no                                                                      |
| Early combination therapy classical DMARDs with glucocorticoids                                                                               | yes/no (as initial treatment strategy)                                      |
| o number of DMARDs included                                                                                                                   | number                                                                      |
| o glucocorticoids starting dose <30mg/day                                                                                                     | yes/no                                                                      |
| o glucocorticoids starting dose $\geq$ 30mg/day                                                                                               | yes/no                                                                      |
| Early combination therapy classical DMARDs without glucocorticoids                                                                            | yes/no (as initial treatment strategy)                                      |
| o number of DMARDs included                                                                                                                   | number                                                                      |
| Biologicals as a first hit                                                                                                                    | yes/no (as initial treatment strategy)                                      |
| Responder to initial treatment (at moment of $t_1$ recruitment)                                                                               | yes/no                                                                      |
| Patient obliged or deciding to discontinue RA treatment (at moment of $t_1$ recruitment; e.g., because of safety reasons, patient's decision) | yes/no                                                                      |
| Reason to not recruit patient                                                                                                                 | free text or N/A (not applicable)                                           |
| Date of study invitation                                                                                                                      | dd/mm/yyyy (sharing of invitation letter)                                   |
| Reason in case not interested in study (if shared)                                                                                            | free text                                                                   |
| Invitation for $t_1$ by phone (if interested)                                                                                                 | dd/mm/yyyy (first contact between patient and researchers)                  |

|                                                                                                                        |                                                                                                                                                                                          |
|------------------------------------------------------------------------------------------------------------------------|------------------------------------------------------------------------------------------------------------------------------------------------------------------------------------------|
| Verbal consent for $t_1$ after phone call                                                                              | yes/no                                                                                                                                                                                   |
| Contact details patient                                                                                                | address/phone number/email                                                                                                                                                               |
| Patient-preferred contact method                                                                                       | by phone or email                                                                                                                                                                        |
| Date and timing of individual interview $t_1$                                                                          | dd/mm/yyyy; hour                                                                                                                                                                         |
| Location of individual interview $t_1$                                                                                 | home or rheumatology practice/clinic                                                                                                                                                     |
| Reminder for $t_1$ sent                                                                                                | dd/mm/yyyy                                                                                                                                                                               |
| Reason in case interview $t_1$ was cancelled (if shared)                                                               | free text                                                                                                                                                                                |
| Respondent gave written informed consent $t_1$                                                                         | yes/no                                                                                                                                                                                   |
| Interviewer $t_1$                                                                                                      | name                                                                                                                                                                                     |
| Interviewer is involved as participant's health professional in daily practice                                         | yes/no                                                                                                                                                                                   |
| $t_1$ respondent gave consent at $t_1$ to be contacted again for second part of study ( $t_2$ )                        | yes/no                                                                                                                                                                                   |
| Reason in case not interested in $t_2$ (at $t_1$ ) participation (if shared)                                           | 'Not interested to share own experiences in group', 'Feeling uncomfortable to talk in group', 'Fear for seeing other patients', 'Not interested in the story of other patients', 'Other' |
| Months of treatment experience at $t_2$                                                                                | date focus group - date treatment start= at least 1 year (between 12-18 months) after treatment initiation                                                                               |
| Invitation letter $t_2$ sent by post                                                                                   | dd/mm/yyyy (by researchers)                                                                                                                                                              |
| Invitation for $t_2$ by phone                                                                                          | dd/mm/yyyy (by researchers)                                                                                                                                                              |
| Verbal consent for $t_2$ after phone call                                                                              | yes/no                                                                                                                                                                                   |
| If not interested in group interview, interested in individual interview instead?                                      | yes/no                                                                                                                                                                                   |
| Reason in case not interested in $t_2$ (if shared)                                                                     | 'Not interested to share own experiences in group', 'Feeling uncomfortable to talk in group', 'Fear for seeing other patients', 'Not interested in the story of other patients', 'Other' |
| Date and timing of focus group $t_2$                                                                                   | dd/mm/yyyy; hour                                                                                                                                                                         |
| Location of focus group $t_2$                                                                                          | clinical or non-clinical setting                                                                                                                                                         |
| If applicable: Date and timing of individual interview $t_2$                                                           | dd/mm/yyyy; hour                                                                                                                                                                         |
| If applicable: Location of individual interview $t_2$                                                                  | home or rheumatology practice/clinic                                                                                                                                                     |
| Reminder for $t_2$ sent (focus group or individual interview)                                                          | dd/mm/yyyy                                                                                                                                                                               |
| Reason in case focus group (or individual interview) $t_2$ was cancelled (if shared)                                   | free text                                                                                                                                                                                |
| Respondent gave written informed consent $t_2$                                                                         | yes/no                                                                                                                                                                                   |
| Moderator $t_2$                                                                                                        | name                                                                                                                                                                                     |
| Observer(s) $t_2$                                                                                                      | name(s)                                                                                                                                                                                  |
| If applicable: Interviewer $t_2$                                                                                       | name                                                                                                                                                                                     |
| Are the (interviewers/) moderators/observers involved as health professionals in the participants' daily clinical care | yes/no                                                                                                                                                                                   |

### Socio-demographic data: patient-reported $t_1$

|                         |                     |
|-------------------------|---------------------|
| Date of birth           | dd/mm/yyyy          |
| Gender                  | man, woman, X       |
| Educational level $t_1$ | low, moderate, high |

|                          |                                                              |
|--------------------------|--------------------------------------------------------------|
| Currently employed $t_1$ | yes/no                                                       |
| Employment status $t_1$  | employed, not employed, retired, housewife/houseman, student |
| Marital status $t_1$     | single, together unmarried, married, widower, other          |
| Living status $t_1$      | alone, with partner and/or kids, with other persons          |

#### **Socio-demographic data: patient-reported $t_2$**

|                          |                                                              |
|--------------------------|--------------------------------------------------------------|
| Educational level $t_2$  | low, moderate, high                                          |
| Currently employed $t_2$ | yes/no                                                       |
| Employment status $t_2$  | employed, not employed, retired, housewife/houseman, student |
| Marital status $t_2$     | single, together unmarried, married, widower, other          |
| Living status $t_2$      | alone, with partner and/or kids, with other persons          |

#### **Clinical data: patient-reported data $t_1$**

|                                             |                                                                                                                                                                                                  |
|---------------------------------------------|--------------------------------------------------------------------------------------------------------------------------------------------------------------------------------------------------|
| VAS general health $t_1$                    | 100-mm visual analogue scale from best (0/100) to worst (100/100)                                                                                                                                |
| VAS pain $t_1$                              | 100-mm visual analogue scale from best (0/100) to worst (100/100)                                                                                                                                |
| VAS fatigue $t_1$                           | 100-mm visual analogue scale from best (0/100) to worst (100/100)                                                                                                                                |
| Key words in preparation of $t_1$ interview | Key words describing: <ul style="list-style-type: none"> <li>- the impact of RA on their life</li> <li>- which outcomes of their illness and treatment they considered most important</li> </ul> |

#### **Clinical data: patient-reported data $t_2$**

|                                                           |                                                                                                   |
|-----------------------------------------------------------|---------------------------------------------------------------------------------------------------|
| VAS general health $t_2$                                  | 100-mm visual analogue scale from best (0/100) to worst (100/100)                                 |
| VAS pain $t_2$                                            | 100-mm visual analogue scale from best (0/100) to worst (100/100)                                 |
| VAS fatigue $t_2$                                         | 100-mm visual analogue scale from best (0/100) to worst (100/100)                                 |
| Key words in preparation of $t_2$ focus group (interview) | Key words describing which outcomes of their illness and treatment they considered most important |

#### **Clinical data: health professional-reported data $t_1$ and $t_2$ (to be extracted from database/patient file)**

|                                         |                                                                  |
|-----------------------------------------|------------------------------------------------------------------|
| Date of diagnosis                       | dd/mm/yyyy                                                       |
| Symptom duration                        | in months, [date of diagnosis - date of symptom onset]           |
| Disease duration                        | in months; calculated with date of diagnosis                     |
| Comorbidity                             | no severe comorbidities present [yes/no]                         |
| Start of treatment                      | dd/mm/yyyy                                                       |
| Months of treatment experience at $t_1$ | date interview $t_1$ - date treatment start = between 3-6 months |
| Months of treatment experience at $t_2$ | date focus group $t_2$ - date treatment start = at least 1 year  |

|                                                                                                            |                                                                                |
|------------------------------------------------------------------------------------------------------------|--------------------------------------------------------------------------------|
| Initial treatment                                                                                          | the local treatment protocol for early RA, free text,<br>no details on dosages |
| Initial treatment allocated according to clinical prognostic factors                                       | yes/no                                                                         |
| Step-down strategy                                                                                         | yes/no (as initial treatment strategy)                                         |
| MTX-only step-up                                                                                           | yes/no (as initial treatment strategy)                                         |
| MTX + early bridging glucocorticoids                                                                       | yes/no (as initial treatment strategy)                                         |
| ○ glucocorticoids starting dose <30mg/day                                                                  | yes/no                                                                         |
| ○ glucocorticoids starting dose ≥30mg/day                                                                  | yes/no                                                                         |
| Early combination therapy classical DMARDs with glucocorticoids                                            | yes/no (as initial treatment strategy)                                         |
| ○ number of DMARDs included                                                                                | number                                                                         |
| ○ glucocorticoids starting dose <30mg/day                                                                  | yes/no                                                                         |
| ○ glucocorticoids starting dose ≥30mg/day                                                                  | yes/no                                                                         |
| Early combination therapy classical DMARDs without glucocorticoids                                         | yes/no (as initial treatment strategy)                                         |
| ○ number of DMARDs included                                                                                | number                                                                         |
| Biologicals as a first hit                                                                                 | yes/no (as initial treatment strategy)                                         |
| Treatment failure in the first year                                                                        | yes/no                                                                         |
| Treatment failure after 1 year                                                                             | yes/no                                                                         |
| Patient who discontinued treatment ( $t_1$ or $t_2$ ; e.g., because of safety reasons, patient's decision) | yes/no                                                                         |

---

*Note.* RA: Rheumatoid Arthritis; MTX: Methotrexate; DMARDs: Disease-Modifying Anti-Rheumatic Drugs; VAS: Visual Analog Scale;  $t_1$ : time point 1= 3-6 months after start of the initial treatment for early rheumatoid arthritis;  $t_2$ : time point 2= 12-18 months after start of the initial treatment for early rheumatoid arthritis.
