# Supplementary material for: European Qualitative research project on Patient-preferred outcomes in Early Rheumatoid Arthritis (EQPERA): rationale, design and methods of a multinational, multicentre, multilingual, longitudinal qualitative study
Source: PubMed Central journal article supplement — BMJ Open. 2019 Mar 27;9(3):e023606. doi: 10.1136/bmjopen-2018-023606 (PMC6475365; doi:10.1136/bmjopen-2018-023606), 2019-03-27
Supplement: bmjopen-2018-023606supp003.pdf [file bmjopen-2018-023606supp003.pdf]

## Supplementary file 3 EQPERA data quality assurance reporting tool

| <b>Domain 1: Research team and reflexivity</b>                                 |                                                                                                                                                                                                                                                                                                                                                                                                                                                                                                                                                                                    |
|--------------------------------------------------------------------------------|------------------------------------------------------------------------------------------------------------------------------------------------------------------------------------------------------------------------------------------------------------------------------------------------------------------------------------------------------------------------------------------------------------------------------------------------------------------------------------------------------------------------------------------------------------------------------------|
| Item                                                                           | Guide questions/description                                                                                                                                                                                                                                                                                                                                                                                                                                                                                                                                                        |
| <i>Researcher characteristics</i>                                              |                                                                                                                                                                                                                                                                                                                                                                                                                                                                                                                                                                                    |
| 1. Interviewer / moderator/observer                                            | Who conducted the interviews/ focus groups? (who observed the focus groups?)<br>▶ Maximum 2 interviewers at $t_1$ and $t_2$ /country and maximum 1 moderator at $t_2$ /country<br>▶ Preferably the same observer(s) for each focus group                                                                                                                                                                                                                                                                                                                                           |
| 2. Credentials / background                                                    | What were the researcher's credentials? (e.g., PhD, RN)                                                                                                                                                                                                                                                                                                                                                                                                                                                                                                                            |
| 3. Occupation                                                                  | What were the researcher's occupation at the time of the study?                                                                                                                                                                                                                                                                                                                                                                                                                                                                                                                    |
| 4. Gender                                                                      | Was the researcher male or female?                                                                                                                                                                                                                                                                                                                                                                                                                                                                                                                                                 |
| 5. Experience and training                                                     | What experience or training did the researcher have?                                                                                                                                                                                                                                                                                                                                                                                                                                                                                                                               |
| <i>Relationship with participants</i>                                          |                                                                                                                                                                                                                                                                                                                                                                                                                                                                                                                                                                                    |
| 6. Relationship established                                                    | Was a relationship established prior to study commencements? (e.g., health professional)                                                                                                                                                                                                                                                                                                                                                                                                                                                                                           |
| 7. Participant knowledge of the interviewer                                    | What did the participant know about the researcher? (e.g., personal goals, reasons for doing the research)                                                                                                                                                                                                                                                                                                                                                                                                                                                                         |
| 8. Interviewer characteristics                                                 | What characteristics were reported about the interviewer/moderator/observer? (e.g., bias, assumptions, reasons and interest in the research topic)                                                                                                                                                                                                                                                                                                                                                                                                                                 |
| <b>Domain 2: Study design (a longitudinal, qualitative, explorative study)</b> |                                                                                                                                                                                                                                                                                                                                                                                                                                                                                                                                                                                    |
| <i>Participant selection</i>                                                   |                                                                                                                                                                                                                                                                                                                                                                                                                                                                                                                                                                                    |
| 9. Sampling                                                                    | How were participants selected (e.g., purposively)<br>Mono or multicenter sampling?<br>Type of recruitment center(s)? (i.e., academic hospital, general hospital or private practice)                                                                                                                                                                                                                                                                                                                                                                                              |
| 10. Method of approach                                                         | Who invited the participants?<br>How were participants approached? (e.g., face to face, telephone, mail, email)                                                                                                                                                                                                                                                                                                                                                                                                                                                                    |
| 11. Sample size                                                                | How many participants were in the study?<br>◆at $t_1$ : number of individual interviews<br>◆at $t_2$ : number of participants per focus group / number of individual interviews                                                                                                                                                                                                                                                                                                                                                                                                    |
| 12. Non-participation                                                          | How many eligible patients could potentially be recruited?<br>How many people were approached and how many of them refused to participate or dropped out?<br>Reasons? (if shared)<br>◆Not interested in participation (refusal)<br>◆Drop out (type 1): in case $t_1$ interview was scheduled and cancelled<br>◆Not interested in participation at $t_2$ (drop out, type 2)<br>◆Not interested in participation in a focus group, but willing to participate in an individual interview instead at $t_2$<br>◆Drop out (type 3): in case $t_2$ interview was scheduled and cancelled |

### *Setting*

13. Setting of data collection Where was the data collected?
14. Presence of non-participants Was anyone else present besides the participant and researchers?
15. Description of sample What are the important characteristics of the sample? (e.g., demographic data)

### *Data collection*

16. Interview guide Were questions, prompts, guides provided by the authors?  
Was the interview guide pilot tested?  
Is it being made available?
17. Focus group guide Were questions, prompts, guides provided by the authors?  
Was the interview guide pilot tested?  
Is it being made available?
18. Audio / visual recording Did the research use audio or visual recording to collect the data?
19. Data collection method How were the data collected? ( $t_2$ : focus group or individual interview?)  
Were repeat interviews carried out at  $t_2$ ?
20. Field notes Were field notes made during and/ or after the interview or focus group?  
► if yes, please record them in the descriptive or methodological interview report.  
Were short reports prepared after each interview?
21. Duration What was the duration of the interviews or focus groups?
22. Data saturation Was data saturation discussed?  
After how many interviews was data saturation reached? (Definition in EQPERA: "if the last 3 interviews do not provide new information, insights or additional understanding to accomplish the study aims")

---

## **Domain 3: Analysis and findings**

---

### *Data analysis*

23. Number of data coders How many data coders coded the data?  
Who coded the data?
24. Independent coding Was the analysis repeated by more than 1 researcher to ensure reliability?
25. Data analysis method How were themes and concepts identified from the data? (e.g., Were themes identified in advance (framework-based) or derived from the data (data-driven?)
26. Patient research partners Did patient research partners provide feedback on the findings, and in which part(s) of the data analysis were they involved?
27. Software What software was used to manage the data?

### *Reporting*

28. Quotations presented Were participant quotations presented to illustrate the themes/findings?  
Was each quote identified? (e.g., participant number, gender, age)
29. Data and findings consistent Was there consistency between the data presented and the findings?
30. Clarity of themes Were themes clearly presented in the findings?
-

## Domain 4: Data management strategies

### *Data recording*

31. Recording changes and decisions  
Were changes to the interview guide, the evolution in themes, deviations from the research protocol, and major local project decisions carefully documented along with the rationale for change?  
▶ to recall decisions  
▶ the use of a research log book is recommended
32. Recording interview data  
Did you record the data with at least 2 audio recorders?  
▶ to prevent missing data

### *Data storing*

33. Routinely storing of data  
Was the data (e.g., audio files, transcripts, interview reports and field notes, patient-reported and clinical data, informed consents) or the project database routinely submitted to a central data repository or a secured cloud storage system?  
▶ to avoid missing data and to easily manage large amounts of data like in qualitative research  
▶ a uniform transcript header and file name could facilitate data storing (e.g., T1.number of interview.ddmmyyy.initials of interviewer)

### *Data check*

34. Internal audit  
Could the evidence (field notes, interview transcripts, recordings, reasons for interview guide adaptations,...) be inspected by others?
35. Preventing missing data  
Did the principal investigator routinely check for missing data?

### *Data collection*

36. Recruitment flow  
Was the recruitment flow carefully documented?  
▶ the use a research log book (enrollment spread sheet) is suggested
37. Templates  
Did you check the data collection templates and the Excel spread sheet?
38. Local interview guide  
Translation/cultural adaptation interview guide:  
Did you use the proposed framework to translate the interview guide into the source language?  
Were cultural adaptations needed?  
▶ please, record these in your research log book, together with the timing and the reason for adjustment
39. Avoiding and handling the presence of a third person  
Focus of attention during interview scheduling:  
Was the purpose of a one to one interview mentioned to the participant?  
If someone else was present, did this affect the interview/data collection?  
▶ please, reflect on this in the descriptive interview report
40. Introducing the interview  
Did you prepare and practice the interview introduction?  
▶ to maximize the interview return  
▶ key words: welcoming the participant; introducing yourself; clarifying the purpose and importance of research, the importance of participant contribution, expectations regarding the participant (e.g., no good or wrong answers), role of the interviewer/moderator/observer, (t<sub>2</sub>: “rules” regarding group discussion), ethical aspects; “Any questions?”; mobile phone on silent mode)

41. Interview burden It is recommended to conduct 1 individual interview/day, with a maximum of 2 interviews/day  
 ► to avoid interview burden and to have sufficient time to reflect on each interview
42. Interview reports Did you write for each interview/focus group 3 short reports? (i.e., content report, descriptive report, methodological report)
43. Iterative process Did you use an iterative process of data collection and analysis?  
 ► to support data saturation

*Data analysis*

44. Analysis guide Did you use Qualitative Analysis Guide of Leuven (QUAGOL) to guide your data analysis?  
 Did you use Saldaña's guiding questions for analyzing the longitudinal data?
45. Peer debriefings Were regular peer debriefings held?  
 ► time for reflection (in team): to discuss the interview return, the development of new themes, and to question and confirm saturation of themes  
 ► early in the coding and interviewing process, more frequent meetings are suggested  
 ► please make a short report of each debriefing to recall discussions
46. Team analysis Was looked at the data in team (from different perspectives looking at the data)

*Transcription*

47. Transcription guidelines Who transcribed the data?  
 ► >1 person: did you apply a uniform transcription method? (e.g., agreements about the level of details, to obtain confidentiality, to reproduce the exact words spoken)  
 ► external transcriber: was the interview transcript reviewed by the interviewer on data quality and accuracy of transcribing? How did you approach this quality check?

*Team approach*

48. Patient research partners What was the exact role of the patient research partners in the study
49. Interdisciplinary team Who joined the interdisciplinary team, and what was their contribution?

*Initiation session*

50. Project initiation Did the local research team (at least the principal investigator) followed the initiation session lead by the project leader at  $t_1$  and at  $t_2$ ?

---

$t_1$ : time point 1= 3-6 months after start of the initial treatment for early rheumatoid arthritis;  $t_2$ : time point 2= 12-18 months after start of the initial treatment for early rheumatoid arthritis.
